# Supplementary material
Source: HighWire-hosted journal article supplement (https://bjo.bmj.com/content/suppl/2011/04/04/95.3.i)
Supplement: Portuguese_Translation_March_2011.pdf [file Portuguese_Translation_March_2011.pdf]

### **Toxoplasma gondii no sangue periférico de pacientes com toxoplasmose**

Silveira et al estudaram 20 pacientes imunocompetentes com toxoplasmose aguda, ativa recorrente e com cicatrizes antigas. Eles também incluíram 10 pacientes com anticorpos IgG anti T. gondii na circulação sem lesões oculares. Amostras de sangue foram analisadas através de microscopia óptica, imunofluorescência e confirmados através de PCR amplificado do DNA do parasita. Organismos semelhantes a taxizoítos foram achados nas amostras sanguíneas de 16 pacientes (9 microscopias, 7 imunofluorescências). Os resultados indicam que o parasita deve circular no sangue de indivíduos imunocompetentes e que a parasitemia poderia estar associada à reativação da doença ocular.

**Veja na página 396**

### **Diagnóstico de endoftalmite através de PCR**

Sugita et al avaliaram o genoma bacteriano de 19 amostras de fluidos oculares (8 aquosos, 11 vítreos) de 19 pacientes com suspeita de endoftalmite bacteriana, 50 amostras oculares de pacientes com uveíte e 40 controles. O DNA ribossômico bacteriano (16SrDNA) medido através de ensaio de PCR quantitativo foi detectável em 18 (95%) dos pacientes com suspeita de endoftalmite bacteriana enquanto apenas 10 amostras (53%) foram positivas para cultura bacteriana e 9 (47%) para coloração Gram. PCR em tempo real detectou 16SrDNA bacteriano em três amostras (6%) de pacientes com uveíte e nenhuma das amostras controle foi positiva. Os autores concluem que PCR para 16S rDNA bacteriano é uma ferramenta útil no diagnóstico de endoftalmite bacteriana.

**Veja na página 345**

### **Procedimento SMILE para miopia e astigmatismo miópico**

Sekundo et al reportam resultados de estudo prospectivo multicêntrico de 6 meses avaliando a viabilidade do procedimento de extração lenticular miópica femtosecond (FLEx) através de microincisão, utilizando o extrator lenticular com incisão pequena (SMILE) em 91 olhos (48 pacientes). A maioria dos olhos tratados (95,6%) estavam com  $\pm 1,0D$  e 80,2% estavam com  $\pm 0,5D$  do planejado. Dos olhos tratados, 83,5% tiveram uma AVMC de 1,0 (20/20) ou melhor. Quando investigados por questionário padrão, 93,3% dos pacientes estavam satisfeitos com os resultados obtidos. Os autores concluíram que SMILE é um procedimento (minimamente invasivo sem confecção de flap) promissor para correção da miopia.

**Veja na página 335**

### **Tranplante de EPR**

Falkner-Radler et al avaliaram a evolução de duas técnicas de transplante do EPR. Quatorze pacientes consecutivos com DMRI exsudativa avançada foram aleatoriamente distribuídos para transplante de EPR-coroíde (grupo 1) ou transplante de suspensão celular de EPR (grupo 2). Aos 24 meses, um ganho de 3 ou mais linhas na AVMC foi vista em dois pacientes no grupo 1 e um paciente no grupo 2, contudo perda de visão de três ou mais linhas ocorreu em um paciente de cada grupo. Revisão cirúrgica para vitreoretinopatia proliferativa foi necessária em um paciente no grupo 1. Não foi observada recidiva. SD OCT mostrou diminuição na espessura retínica em todos os pacientes. Os autores concluem que a evolução anatômica e funcional após ambas as técnicas de transplante de EPR foi equivalente.

**Veja na página 370**

### **Membranas epirretínicas após bevacizumab intravítreo para oclusão venosa da retina**

Marticoarena et al reportam o desenvolvimento de membranas epirretínicas (MER) em 25 olhos (25 pacientes) com oclusão venosa da retina (OVR) tratados com bevacizumab intravítreo. Após injeção inicial de 2,5mg/0,1 ml intravítreo, todos os

pacientes foram acompanhados a cada 6 semanas. Quatro olhos desenvolveram MER dentro de 6 a 7 semanas após a administração do bevacizumab. Os autores sugerem que bevacizumab intravítreo pode estar associado à MER em olhos com OVR.

**Veja na página 391**

#### **Analisando imagens de bolhas após facotrabeculectomia**

Boey et al compararam bolhas após facotrabeculectomias realizadas com implantes colágenos Ologen (33 pacientes) e com bolhas após mitomicina C (MMC) (33 pacientes). As bolhas foram analisadas quanto à altura e área utilizando o OCT de segmento anterior (OCTSA) e graduação clínica. Com OCTSA, não houve diferença na altura média no dia 30 e 60, mas no dia 90 a altura da bolha era menor no grupo Ologen (Ologen vs MMC, 0,74 vs 1,0 mm). No dia 90 os implantes Ologen eram visíveis (OCTSA) em 13 participantes (39,4%). Os autores concluem que em 3 meses de cirurgia, a altura média da bolha foi menor nas bolhas com Ologen comparadas às com MMC. Os implantes Ologen não se degradaram em um terço dos olhos.

**Veja na página 340**

#### **Uma revisão da segurança de bevacizumab versus ranibizumab para DMRI**

Schmucker et al conduziram uma revisão sistemática para comparação dos efeitos adversos (EA) e a publicação de dano em estudos controlados de distribuição aleatória (RCTs) e não-RCTs, avaliando bevacizumab e ranibizumab intravítreo em DMRI. Os resultados de estudos fase III com 2 anos avaliando ranibizumab mostram que a taxa de EA oculares sérios foi baixa] ( $\leq 2,1\%$ ) mas indicaram preocupações com a segurança (RR 1,35) e um aumento significativo de hemorragias não oculares (RR 1,62) foi também notado. Contrariamente, os RCTs avaliando bevacizumab são de valor limitado devido ao tamanho pequeno das amostras e aparente falha no rigor do monitoramento para EA. Os autores concluem que qualquer percepção de que injeções de bevacizumab intravítreo não estão associadas a danos oculares ou sistêmicos por EA não são suportadas por dados confiáveis.

**Veja na página 308**
